# Supplementary material for: Intraocular siRNA Delivery Mediated by Penetratin Derivative to Silence Orthotopic Retinoblastoma Gene
Source: Pharmaceutics. 2023 Feb 23;15(3):745. doi: 10.3390/pharmaceutics15030745 (PMC10053059; doi:10.3390/pharmaceutics15030745)
Supplement: Supplementary file 1 [file pharmaceutics-15-00745-s001.zip › pharmaceutics-2037790-supplementary.pdf]

# **Intraocular siRNA Delivery Mediated by Penetratin Derivative to Silence Orthotopic Retinoblastoma Gene**

**Xin Gao<sup>1,†</sup>, Xingyan Fan<sup>1,†</sup>, Kuan Jiang<sup>1,2</sup>, Yang Hu<sup>1</sup>, Yu Liu<sup>1</sup>, Weiyue Lu<sup>1,3</sup>, Gang Wei<sup>1,3,4,\*</sup>**

<sup>1</sup> Key Laboratory of Smart Drug Delivery, Ministry of Education & Department of Pharmaceutics, School of Pharmacy, Fudan University, Shanghai 201203, China

<sup>2</sup> Department of Pharmacology, School of Basic Medical Sciences & State Key Laboratory of Molecular Engineering of Polymers, Fudan University, Shanghai 200032, China

<sup>3</sup> The Institutes of Integrative Medicine of Fudan University, Shanghai 200040, China

<sup>4</sup> Shanghai Engineering Research Center of ImmunoTherapeutics, Shanghai 201203, China

\* Correspondence: weigang@shmu.edu.cn; Tel.: +86-21-5198-0091; Fax: +86-21-5198-0090

† These authors contributed equally to this work.

**Table S1.** Cellular uptake inhibitors and their function mechanisms

| Inhibitor     | Final concentration  | Mechanism of action                                                             |
|---------------|----------------------|---------------------------------------------------------------------------------|
| Filipin       | 20 $\mu\text{g/mL}$  | Bind to cholesterol on the cell membrane and inhibit endocytosis                |
| M $\beta$ -CD | 300 $\mu\text{g/mL}$ | Deplete cholesterol and suppress endocytosis                                    |
| Genistein     | 20 $\mu\text{g/mL}$  | Inhibit lipid raft/caveolae mediated endocytosis                                |
| Colchicine    | 20 $\mu\text{g/mL}$  | Inhibit pinocytosis by binding to tubulin to prevent microtubule polymerization |
| Dynasore      | 20 $\mu\text{g/mL}$  | Inhibit dynamic proteins in clathrin-mediated endocytosis                       |

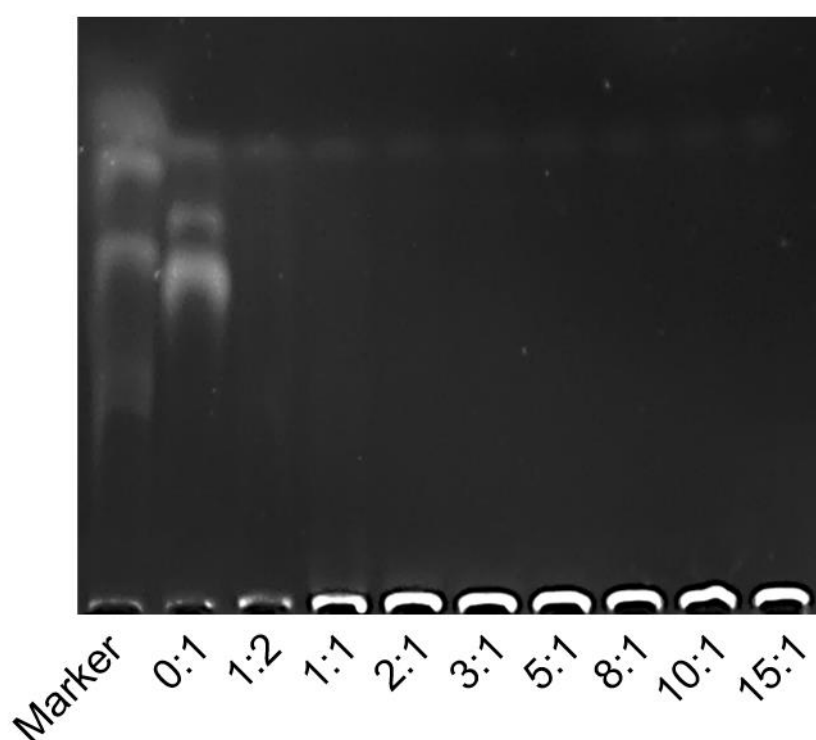**Figure S1.** Polyacrylamide gel electrophoresis of primary polyplexes siRNA/PA. The ratio is N/P of 3rd generation PAMAM to siRNA.

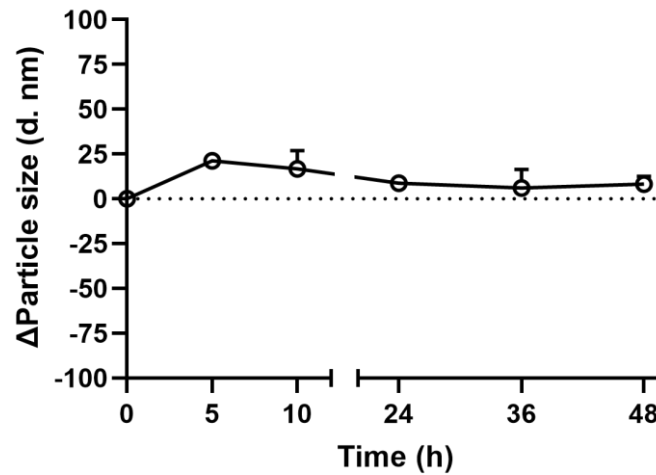

**Figure S2.** Time-dependent particle size variation of siRNA/PA/89WP incubated in 10 mM PBS at 4 °C ( $n=3$ ).

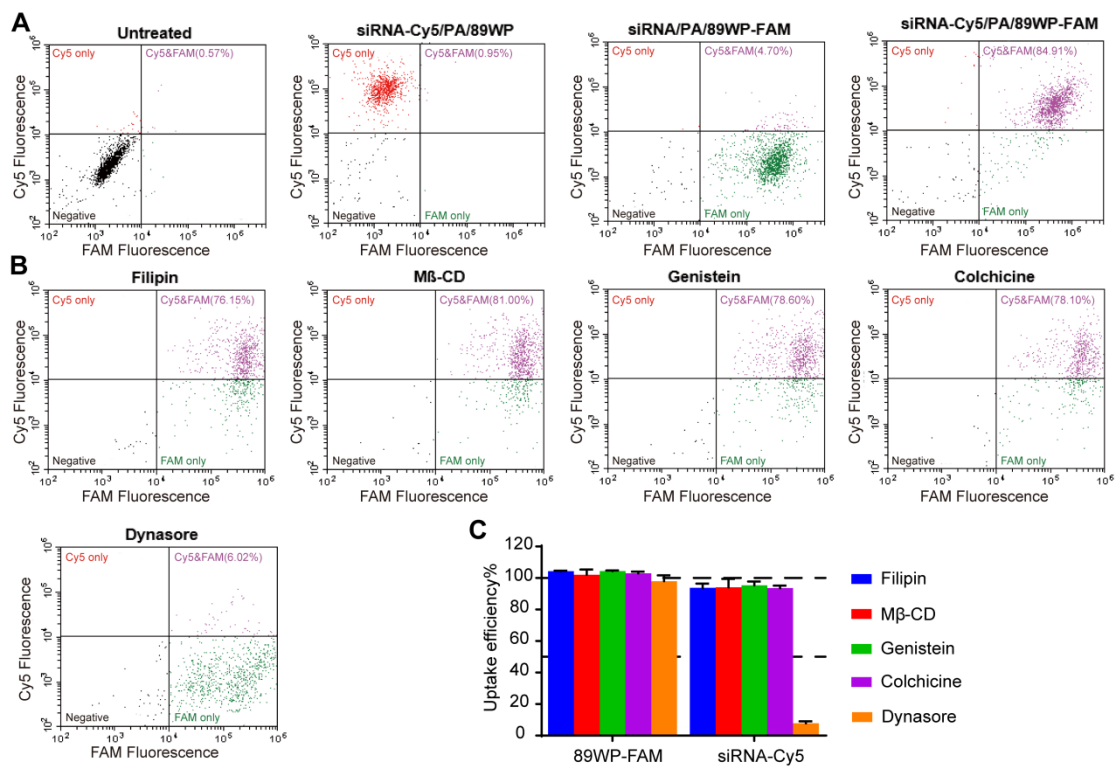

**Figure S3.** Cellular uptake pathway of the siRNA polyplexes in WERI-Rb-1 cells. (A) Flow cytometry diagrams of WERI-Rb-1 cells treated with polyplexes siRNA-Cy5/PA/89WP, siRNA/PA/89WP-FAM, and siRNA-Cy5/PA/89WP-FAM, respectively. (B) Flow cytometry diagrams of WERI-Rb-1 cells treated with polyplex siRNA-Cy5/PA/89WP-FAM in the presence of various cellular uptake inhibitors. (C) Effects of the inhibitors on uptake efficiency of siRNA-Cy5/PA/89WP-FAM by WERI-Rb-1 cells ( $n=3$ ).

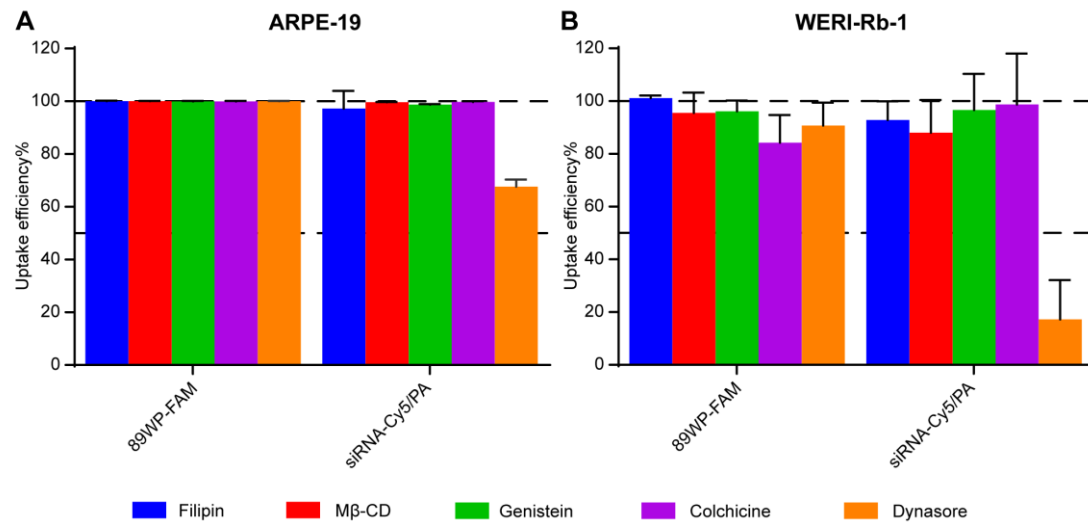

**Figure S4.** Effects of various inhibitors on uptake efficiency of single fluorescence-labeled peptide (89WP-FAM) and primary polyplex (siRNA-Cy5/PA) in ARPE-19 (A) and WERI-Rb-1 (B) cells ( $n=3$ ).
